# Supplementary material
Source: Springer Nature journal article supplement (http://www.springermedizin.de/resource/supplementary/12986_2010_337_MOESM4_ESM.pdf/25655856)

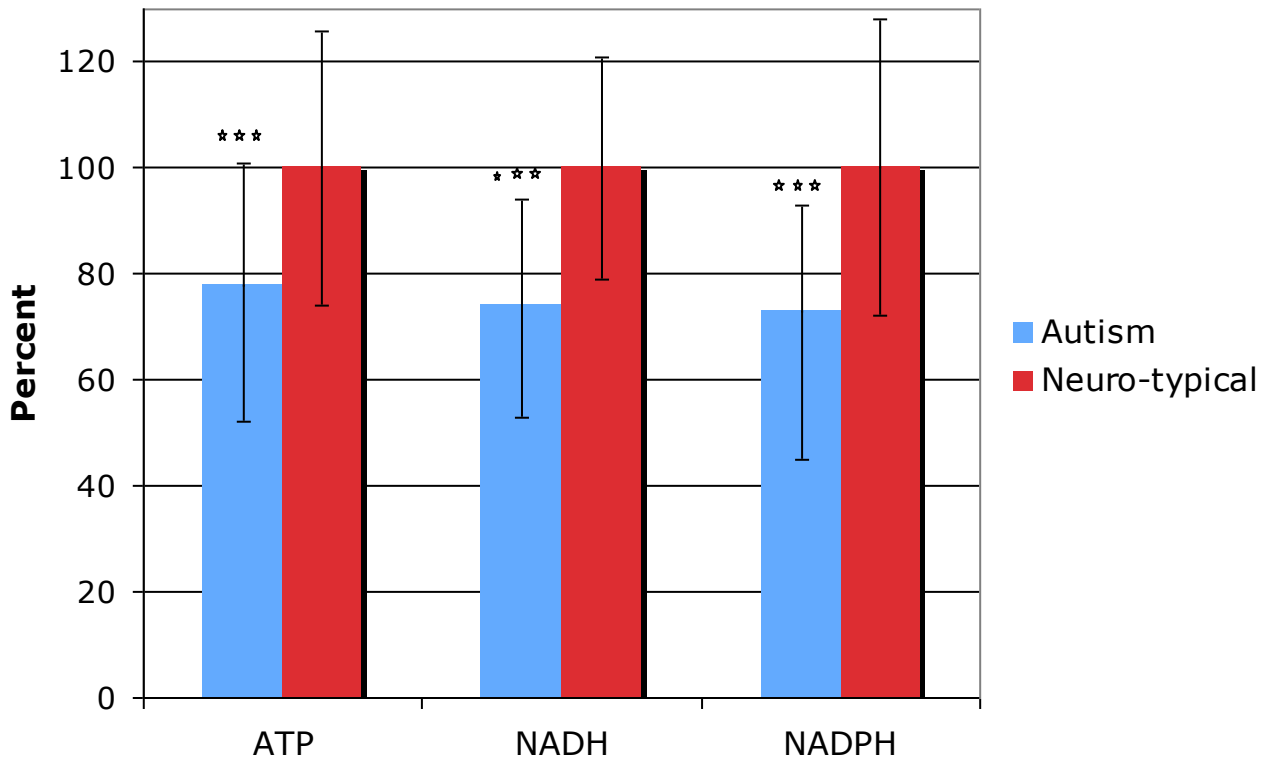

Supplement: MOESM4 [file 25655856]
